# Deep learning classification of temporal data in ecology

César Capinha<sup>1</sup>, Ana Ceia-Hasse<sup>2</sup>, Andrew M. Kramer<sup>3</sup>, Christiaan Meijer<sup>4</sup>

<sup>1</sup>Centro de Estudos Geográficos, Instituto de Geografia e Ordenamento do Território - IGOT, Universidade de Lisboa, Rua Branca Edmée Marques, 1600-276 Lisboa, Portugal.

<sup>2</sup>Global Health and Tropical Medicine, Institute of Hygiene and Tropical Medicine, NOVA University of Lisbon, Rua da Junqueira 100, 1349-008 Lisbon, Portugal.

<sup>3</sup>Department of Integrative Biology, University of South Florida, Tampa, Florida, USA.

<sup>4</sup>Netherlands eScience Center, Science Park 140, 1098 XG Amsterdam, the Netherlands.

*Correspondence to* César Capinha | [cesarcapinha@campus.ul.pt](mailto:cesarcapinha@campus.ul.pt)

## Abstract

Temporal data is ubiquitous in ecology and ecologists often face the challenge of accurately differentiating these data into predefined classes, such as biological entities or ecological states. The usual approach transforms the temporal data into static predictors of the classes. However, recent deep learning techniques can perform the classification using raw time series, eliminating subjective and resource-consuming data transformation steps, and potentially improving classification results. We present a general approach for time series classification that considers multiple deep learning algorithms and illustrate it with three case studies: *i*) insect species identification from wingbeat spectrograms; *ii*) species distribution modelling from climate time series and *iii*) the classification of phenological phases from continuous meteorological data. The deep learning approach delivered ecologically sensible and accurate classifications, proving its potential for wide applicability across subfields of ecology. We recommend deep learning as an alternative to techniques requiring the transformation of time series data.

**Keywords:** Deep learning; Ecological prediction; Scalability; Sequential data; Temporal ecology; Time series

## Introduction

The recent increase in affordability, capacity, and autonomy of sensor-based technologies (Peters *et al.* 2014; Bush *et al.* 2017), as well as an increasing number of contributions from citizen scientists and the establishment of international research networks (Hurlbert & Liang, 2012; Bush *et al.* 2017) is allowing an unprecedented access to time series of interest for ecological research (Reichstein *et al.* 2019). A common aim of ecologists using these data concerns assigning them into predefined classes, such as ecological states or biological entities. Typical examples include the recognition of bird species from sound recordings (e.g. Priyadarshani *et al.* 2020), the distinction between phases in the annual life cycle of plants (i.e., ‘phenophases’) from spectral time series (Melaas *et al.* 2013), or the recognition of behavioural states from animal movement data (Shamoun-Baranes *et al.* 2016). Many other examples exist, with scopes of application that range from the molecular level (Jaakkola *et al.* 2000) to the global scale (e.g. Schneider *et al.* 2010).

The assignment of time series into one of two or more predefined classes (hereafter referred to as ‘time series classification’; Keogh & Kasetty 2003) can be performed using a variety of different approaches, ranging from manual, expert-based, classification (Priyadarshani *et al.* 2020) to fully automated procedures (see Bagnall *et al.* 2017 for examples). In ecology, time series classification is generally approached by processing the time series data into a new set of ‘static’ variables – using hand-designed transformations, or techniques such as Fourier or wavelet transforms – and then using these variables as predictors in ‘classical’ classification algorithms, such as logistic or multinomial regressions or random forests (e.g. Reside *et al.* 2010; Shamoun-Baranes *et al.* 2016; Dyderski *et al.* 2017; Capinha 2019; Priyadarshani *et al.* 2020). In machine learning terminology, this approach is known as ‘feature-based’, where the ‘features’ are the variables that are extracted from the time series.

Despite the wide adoption of feature-based approaches, important limitations still undermine their predictive performance and scalability. A key constraint concerns the need for domain-specific knowledge about the phenomenon that is being classified to obtain ‘optimal’ sets of features. While this may not seem limiting, considering the ever-growing body of knowledge in the ecological literature, in reality few, if any, ecological phenomena are fully understood (Currie 2019). This inherently limits and casts doubt about the optimality of human-mediated selections of ‘relevant’ predictors. This limitation can be illustrated for species distribution modelling, a popular field among ecological modellers. These models often rely on readily available sets of predictors that summarize long-term climate averages and variability, (e.g. the ‘BIOCLIM’ variables; Booth *et al.* 2014), despite recognition that species distributions can also respond to short-term meteorological variation (e.g. Reside *et al.* 2010). Accordingly, these common predictors cannot guarantee a comprehensive representation of the role of climate in determining the distribution of species. Additionally, scaling modelling frameworks can result in reliance on pre-processed predictors because performing species-specific feature extraction could be prohibitively costly, in terms of human and time resources, when modelling the distribution of hundreds of species.

Here we discuss and demonstrate the use of supervised deep learning models for time series classification. Deep learning models are a set of recent, complex architectures of artificial neural networks (LeCun *et al.* 2015; Christin *et al.* 2019), which have enabled significant advances of performance in highly complex tasks, particularly image recognition (LeCun *et al.* 2015) – including in ecology (e.g. Brodrick *et al.* 2019; Christin *et al.* 2019). Recently, the usefulness of these models for classification of temporal data has also been highlighted (Wang *et al.* 2017; Fawaz *et al.* 2019), but the wide potential of this application in ecology remains virtually ignored. A key difference between deep learning models and feature-based approaches is that deep learning models work directly with the raw time series.

The identification of relevant features in the time series is performed by the model itself and is guided by the contribution that these have in distinguishing the classes. Accordingly, a promise of these models is that they may capture relevant information (e.g. thresholds, lag effects; carryover effects; Ryo *et al.* 2019) that would be missed if relying on subjective sets of static features, improving predictive performances. Additionally, because there is no need of human intervention in feature extraction, deep learning models allow a full, end-to-end, automation of computational workflows.

We explain deep neural networks and describe some of the modelling architectures more relevant in the context of classifying time series. Next, we describe a general approach to the application of deep learning models for time series classification, and illustrate it using three case studies from distinct subfields of ecology: species identification, species distribution modelling and phenological prediction. We provide computer code that could be easily adapted for a wide range of temporal classification tasks in ecology.

## Materials and Methods

### *Deep neural networks for time series classification*

Artificial neural networks (ANN) are algorithms inspired by how biological nervous systems process information. These models are often conceptualised in terms of nodes (or ‘neurons’) and weighted links. A basic ANN architecture includes a first layer of nodes, representing the input data, a second (‘hidden’) layer with nodes performing data aggregation followed by nonlinear transformation, and a final (‘output’) layer where the predicted values are computed. The nodes in each layer are connected to the nodes in the next layer through weighted links. Function fitting in ANNs proceeds by iteratively adjusting the weights of links between the layers. An important notion is the ‘epoch’, which refers to when the entire training dataset is passed forward and backward across the network one time. During each epoch, the weights are updated to improve the network’s predictions, given the information fed to the input layer.

For more details on ANNs see, among others, LeCun *et al.* (2015) and references therein.

‘Deep’ neural networks refer broadly to ANN architectures that are capable of training large numbers of hidden layers and neurons (LeCun *et al.* 2015). This capacity determines the level of abstraction that the models can attain in representing the input data. Models with more hidden layers can capture more complex patterns and achieve a deeper hierarchy of features. In other words, shallow models tend to capture ‘basic’ patterns (e.g. a ‘spike’ in a specific time step), while deeper models are able to ‘learn’ more complex abstractions (e.g. spikes combined with a reduced long-term variability).

Unlike commonly believed, deep learning models do not always require large amounts of data for training. For instance, some of these models can provide competitive classification results with as low as 50 samples (Fawaz *et al.* 2019).

Many deep learning architectures can be used for time series classification (Wang *et al.* 2017; Fawaz *et al.* 2019). These architectures differ in the number of layers, and the mathematical functions the layers perform, as well as in the way information flows between them. Below we provide a description of four architectures used for time series classification. These architectures were chosen because they are widely adopted for time series classification and because they are available in *mcfly* (the software we use here for model implementation; van Kuppevelt *et al.* 2020).

### *Convolutional Neural Networks*

Convolutional neural networks (CNN) are an influential class of deep neural networks. These networks have been mainly applied for pattern recognition in image data (e.g. Brodrick *et al.* 2019; Christin *et al.* 2019), but effective examples of their application for time series classification have been recently published (e.g. Zhao *et al.* 2017). A key component of CNNs are the so-called convolutional layers (LeCun *et al.* 2015). These layers extract local features from the raw time series by applying ‘filters’. Each filter

determines if a given pattern (e.g. ‘a spike’) occurs in the data and in what regions. These layers are often followed by rectified linear unit (ReLU) (or a similarly shaped function) and ‘pooling’ layers. The ReLU layers transform the summed weighted input from nodes in the convolutional layer into outputs that range from 0 to  $+\infty$ , while pooling layers reduce the dimensionality of outputs from the ReLU layer. CNNs often layer multiple instances of convolution, ReLU and pooling layers in a sequence, to build a hierarchy of increasingly abstract features. This sequence of layers is usually followed by a fully connected (or ‘dense’) layer, where each node is connected to all nodes in adjacent layers, and where classification outputs are calculated.

### *Recurrent Neural Networks*

Recurrent neural networks (RNNs) are specifically designed for sequence-type input data, such as time series (LeCun *et al.* 2015; Fawaz *et al.* 2019). These models are defined by inclusion of feedback loops, where the output of a layer is added to the next input and fed back into the same layer. This allows RNNs to characterize sequential patterns in the input data, but their ability to capture long term dependencies is limited due to the RNN’s tendency to prioritize signals in the short term while failing to learn long term signals (i.e., the ‘vanishing gradient problem’; Bengio *et al.* 1994). To overcome this problem several adaptations to the simple RNN architecture have been proposed, the most popular of which being the use of gating units, such as ‘Long Short Term Memory’ (LSTM) and ‘Gated Recurrent Units’ (GRU) (Chung *et al.* 2014). Gating is a technique that helps the networks decide to either forget the current input or to remember it for future time steps, hence effectively improving the modelling of long-term dependencies (Chung *et al.* 2014).

### *Residual Networks*

Residual networks (ResNet) are recently proposed in the context of image recognition (He *et al.* 2016). Basically, these networks introduce a new type of component, the ‘Residual Block’, to CNN-type models. The aim of these blocks is to allow the training of deeper models (i.e., having more hidden

layers). In theory, deeper models should improve classification performances, as they allow higher levels of data abstraction. However, in practice the performances may not improve, among other things, due to the vanishing gradient problem (see above). The use of residual blocks aims to address this by forwarding the output of layers directly into layers that are several levels deeper (e.g. 2–3 layers ahead). Recently, this architecture has been applied for time series classification (Wang *et al.* 2017), often performing very well (Fawaz *et al.* 2019).

### *Inception Time Networks*

Inception time networks are a very recent type of architecture, proposed specifically for time series classification (Fawaz *et al.* 2019). This network is an ensemble of CNN models having ResNet-type components and modules called ‘inceptions’. Inception modules ‘rework’ how convolution layers act in the networks, so that instead of being stacked sequentially, they are ordered to work on the same level in parallel. This approach allows the application of multiple filters with highly varying temporal lengths working on the same input time series. In comparison to sequential convolutional layers (as in ‘simple’ CNN) this lowers processing costs and reduces the risk of fitting noise in the data (i.e., overfitting) (Fawaz *et al.* 2019).

### *The mcfly Python library*

Deep learning models can be implemented using several programming languages and specialised libraries (see Christin *et al.* 2019 for a review). Here, we use mcfly, a Python package for time series classification using deep learning (van Kuppevelt *et al.* 2020).

Mcfly utilizes TensorFlow ([www.tensorflow.org](http://www.tensorflow.org)) an extensively adopted machine learning library, it can make use of (but does not require) dedicated hardware (such as Graphical Processing Units: ‘GPUs’), works with both univariate and multivariate time series and includes procedures for inspecting and visualizing the parameters of trained models. In its current version (v.3.0) mcfly allows implementing CNN, Deep convolutional LSTM (‘DeepConvLSTM’; an

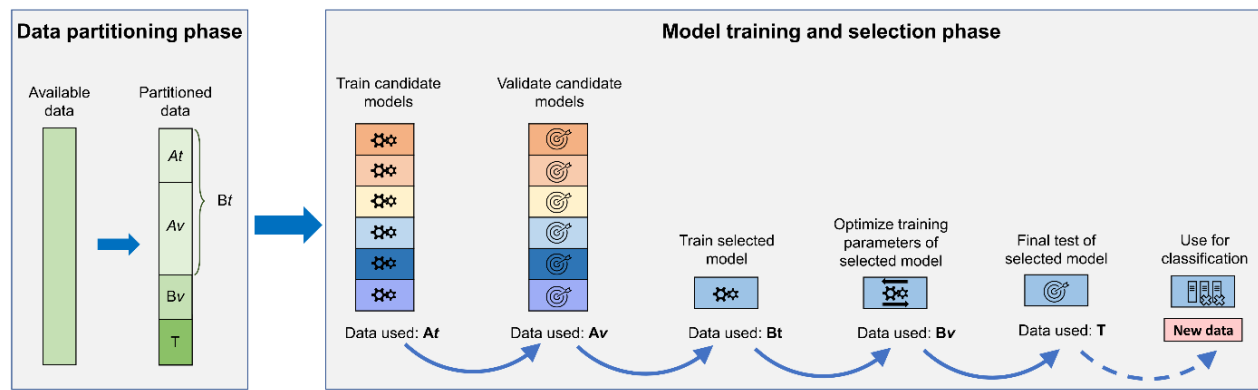

**Figure 1.** Schematic of data partitions and modelling workflow used by the ‘mcfly’ Python package for time series classification.

architecture composed of convolutional and LSTM recurrent layers), ResNet and InceptionTime architectures. Specific details about the components and structure of each architecture are given in van Kuppevelt *et al.* (2020).

Mcfly delivers a standardized workflow that ‘generates’ distinct, ready-to-train models and tests which is best suited for the classification task. This proceeds by generating a set of candidate models with architectures and hyperparameters (e.g. number of layers; learning rate) selected at random from a prespecified range of values (see Fig. 1). Each candidate model is trained using a small subset of the data (data partition  $A_t$ ; Fig. 1) during a small number of epochs. After training, the performance of the candidate models is compared using a left-out validation data set ( $A_v$ ; Fig. 1). The selected candidate model (usually the best performing among candidates) is then trained on the full training data ( $B_t$ ; Fig. 1). In this step it is required to identify an optimal number of training epochs, to avoid under- or overfitting of the model. A model trained too few epochs will not capture all relevant patterns in the data, reducing predictive performance. A model trained for an excessive number of epochs might overfit, reducing its generality and ability to classify new data. There is no definitive way to identify an optimal number of training epochs, but one practical approach is through monitoring the model’s validation performance (i.e., using

holdout data partition  $B_v$ ; Fig. 1). The ‘optimal’ number of training epochs is the one that provides the best validation performance. Finally, the performance of the model having an ‘optimal’ number of training epochs is evaluated using a ‘final’ test data set ( $T$ ; Fig. 1), providing the best estimate of the predictive performance of the model.

For the three case studies below, we used the same model generation and selection strategy. We had mcfly generate 20 candidate models, five for each architecture type. These models were trained during 4 epochs (using  $A_t$ ). The candidate model achieving highest performance in predicting the classes of the validation data ( $A_v$ ) was then trained on the full training data set ( $B_t$ ). For each epoch we measured training performance, as provided by mcfly (which uses the accuracy metric i.e., ‘the proportion of cases correctly classified’). The classification performance on the validation data ( $B_v$ ) was measured using the area under the receiver operating characteristic curve (AUC), a metric that is not affected by differences in the prevalence of classes and is widely used in ecology (e.g. Dyderski *et al.* 2017).

To identify an ‘optimal’ number of training epochs, we examined the progression of validation performance ( $B_v$ ). Models can be trained for an infinite number of epochs, so here we stopped training if no increase in validation performance was observed after 25

epochs (other thresholds could be considered, according to time resources available). Finally, the model trained with the number of epochs showing highest AUC in predicting  $B_v$  was used to classify the test data (data set T), with performance measured using AUC.

We recorded processing time of all models from the onset of training of candidate models to the last training epoch evaluated for the selected model. This was done on two distinct systems: a ‘desktop PC’ with an Intel i7 4-Core (3.40GHz) processor and 8GB RAM and a ‘high-end workstation’ with an AMD Ryzen 9 12-Core (3.80 GHz) processor, 64 GB RAM and an NVidia RTX 2060 GPU. Because CPU- and GPU-based TensorFlow generate distinct random hyperparameters, modelling results will differ between the two computer systems. We report results and processing times for the desktop PC system. For the workstation we report processing time only. We emphasize that the timings recorded in the two systems are not directly comparable as they correspond to distinct modelling routes.

It is important to bear in mind that the modelling strategy described aims at general applicability and further tailoring for specific classification tasks could be beneficial. For instance, with *a priori* knowledge that a specific architecture, say CNN, is best suited for the classification task at hand (see discussion section), the selection could be adjusted to generate only CNN-type candidate models. Further information about fine-tuning of mcfly model generation and selection can be found in van Kuppevelt *et al.* (2020).

#### *Case study 1: Species identification*

In this case study we predict the identity of three insect species: the olive fruit fly (*Bactrocera oleae*), the western honey bee (*Apis mellifera*), and the black fig fly (*Lonchaea aristella*) using wingbeat spectrograms (frequency series of amplitude values; Potamitis *et al.* 2015). *B. oleae* is an olive fruit fly pest, which if left unmanaged can lead to large economic costs worldwide (Potamitis *et al.* 2015). The wingbeat spectrum characteristics of these three species allow us to exemplify an ‘easy’ classification case and

a ‘difficult’ classification case: while in *A. mellifera* harmonics partially overlap with those of *B. oleae*, these species show important differences in frequencies and thus constitute the ‘easy’ classification case; in contrast, *L. aristella* has a wingbeat spectrum that completely overlaps with that of *B. oleae*, representing the ‘difficult’ classification case.

We thus have three classes, each corresponding to a species ‘positive’ identity. The data are balanced (i.e. the number of samples per class is similar) and consist of 230 samples for *B. oleae*, 205 for *A. mellifera*, and 252 for *L. aristella*.

Species were identified (classified) according to their wingbeat spectrograms, which consist of frequency series of amplitudes (the predictor variable) obtained from Potamitis *et al.* (2015). A sample was composed of a total of 256 steps (frequencies), each step corresponding to an amplitude value for a frequency. This case study illustrates the use of these models using only one predictor variable (i.e., a single time series).

The records of species identity data and predictor variable (amplitude per frequency) were split into: data for training candidate models (~50%;  $A_t$ ), data for validating candidate models (~20%;  $A_v$ ), data for training the selected model (~70%;  $B_t$ ; resulting from merging the two previous data sets), validation data for determining the number of epochs for training the selected model (~15%;  $B_v$ ) and test data for final assessment of classification performance (~15%; T in Fig. 1).

#### *Case study 2: Species distribution model*

In this case study we predict the potential distribution of *Galemys pyrenaicus* (Iberian desman) using time series of environmental data. *Galemys pyrenaicus* is a vulnerable semi-aquatic species, endemic to the Iberian Peninsula and the Pyrenean Mountains. We collected distribution records from the Portuguese and Spanish atlases of mammals (Palomo *et al.* 2007; Bencatel *et al.* 2017). The data consists of 6141 UTM grid cells of 10×10 km, of which 659 record the species presence

(class ‘Presence’) and 5482 its absence (class ‘Absence’).

The environmental conditions in each cell were characterized using four variables: 1) maximum temperature; 2) minimum temperature, 3) accumulated precipitation, and 4) altitude. The first three variables consist of time series of monthly values collected from CHELSA (Karger *et al.* 2017) spanning 1989 to 2013, totalling 300 time steps. The fourth variable was from Fick & Hijmans (2017) and corresponds to temporally invariant values of altitude (demonstrating inclusion of temporally static predictors), coded as a time series.

Species distribution data and predictors were split similarly as above with different proportions: a)  $A_t \sim 35\%$ , b)  $A_v \sim 35\%$ , c)  $B_t \sim 70\%$ ; resulting from merging  $A_t$  and  $A_v$ , d)  $B_v \sim 15\%$ , and e) test data set  $T \sim 15\%$ . The low percentage of data used for training the candidate models in comparison to case study 1 aims to reduce computer processing time, given larger data volume.

The training and internal validation of deep learning models are sensitive to class imbalance (i.e., when one or several classes have a much higher number of samples). Strong class imbalance can bias models towards the prediction of majority classes (Menardi & Torelli, 2014) and reduces the reliability of performance metrics such as accuracy *sensu stricto* (i.e., the proportion of correct predictions to the total number of samples), which is used for the automated selection of candidate models in *mcfly* (van Kuppevelt *et al.* 2020). Accordingly, we balanced our data by randomly duplicating presence records and deleting absence records until a balance of  $\sim 50:50$  is obtained, which was executed using the ROSE package (Lunardon *et al.* 2014) for R (R Core Team, 2020). This was done for the data sets that *mcfly* uses for internal assessment of accuracy *s.s.* ( $A_t$ ,  $A_v$  and  $B_t$ , Fig. 1). Data partitioning was performed prior to balancing, to avoid inclusion of replicated cases of the same data across multiple partitions. The remaining data sets (i.e.,  $B_v$  and  $T$ ) were not balanced.

### Case study 3: Phenological prediction

In this case study we predict the timing of fruiting of the *Macrolepiota procera* (Parasol mushroom) across Europe. This species produces fruiting bodies valued for human consumption (Capinha 2019) and predicting their emergence could be useful for managing human pressure on the species and its habitats. Data is from Capinha (2019), a study employing a feature-based approach to achieve an equivalent aim. The data have two classes. One class (‘fruiting’) corresponds to locations and dates of observation of fruiting bodies of the species (from 2009 to 2015). The second class corresponds to ‘temporal pseudo-absences’, which are records in the same locations of the observation records, but with dates selected at random along the temporal range of the study (Capinha 2019). The aim of the classification is to distinguish the meteorological conditions associated with the observation of fruiting bodies of the species from the range of meteorological conditions that are available to it.

We characterized each record using four time series: 1) mean daily temperature for the preceding 365 days, 2) daily total precipitation for the preceding 365 days, 3) latitude and 4) longitude. Time series of temperature and precipitation were extracted from the daily AGRI4CAST maps (<http://agri4cast.jrc.ec.europa.eu/>), at a cell resolution of 25x25 km. Geographical coordinates were coded as temporally invariant time series.

Records from 2009 to 2014 were randomly partitioned into:  $A_t$ : 15%,  $A_v$ : 70%,  $B_v$ : 15%, and  $B_t$ : 85% (merging  $A_t$  and  $A_v$ ). Data for the year 2015 was used to evaluate the predictive performance of the final model ( $T$ ), allowing comparison with the performance results achieved in Capinha (2019).

To increase the representation of the meteorological conditions occurring in the location of each observation record, the data consists of 15 pseudo-absence records per each observation record (Capinha, 2019). Similarly to the previous case study, we corrected for

class imbalance by balancing the number of samples in each class using a random deletion and duplication approach (Lunardon *et al.* 2014). This balancing was performed for data sets *At*, *Av* and *Bt*.

## Results

### *Species identification*

The candidate model with greatest ability to distinguish between the spectrograms of the three insect wingbeats had an InceptionTime architecture (accuracy = 0.85; model number 15; Fig. 2b). On the training data set this model showed a progressively increasing training accuracy with number of epochs (Fig. 2c). However, its evaluation against left-out data (*Bv* data set; Fig. 1) showed that best performances were found mainly between training epoch ~30 and ~50 ('validation AUC'; Fig. 2c), followed by little change. The highest validation performance was obtained after 47 training epochs. On the test data (T; Fig. 1), this model achieved an average AUC of 0.96, resulting from an AUC of 1 in classifying between *B. oleae* and *A. mellifera*, an AUC of 0.88 in classifying between *B. oleae* and *L. aristella* and an AUC of 1 in classifying between *A. mellifera* and *L. aristella*. Computer processing time, from the onset of candidate model training to the 72<sup>nd</sup> training epoch of the selected model, took 26 minutes on a desktop PC. On the high-end workstation, a distinct modelling event took 3 minutes.

### *Species distribution model*

The best performing candidate model for this case study had a CNN-type architecture (model number 4; Fig. 3b), reaching 0.82 of

validation accuracy. Using the full training data set, this model showed a decreasing trend in validation values after the ~60<sup>th</sup> epoch (*Bv*; 'validation AUC'; Fig. 3c), with highest performing classification at the 56<sup>th</sup> training epoch. The model trained with this number of epochs achieved an AUC of 0.95 on the final test data (T). Most of northern Iberian Peninsula was predicted as suitable to *Galemys pyrenaicus*, particularly the high mountainous areas (Fig. 3e). Computer processing time took 2 hours and 49 minutes on a desktop PC. A distinct modelling event on the high-end workstation took 19 minutes.

### *Phenological prediction*

For this case study, the selected candidate model had an InceptionTime-type of architecture (model number 2; Fig. 4a), achieving 0.81 validation accuracy. The classification performance of this model (measured with external data; *Bv*) increased only up to the 5<sup>th</sup> epoch (Fig. 4b). The model trained for 5 epochs achieved an AUC of 0.91 on the final test data. The predicted probabilities of fruiting for an example site (Fig. 4c) show the ability of the model to capturing seasonal variation, with higher probabilities generally being predicted for the Autumn season, but with important inter-annual differences. Computer processing time took 10 hours and 23 minutes on a desktop PC. On a high-end workstation a distinct modelling event took 18 minutes.

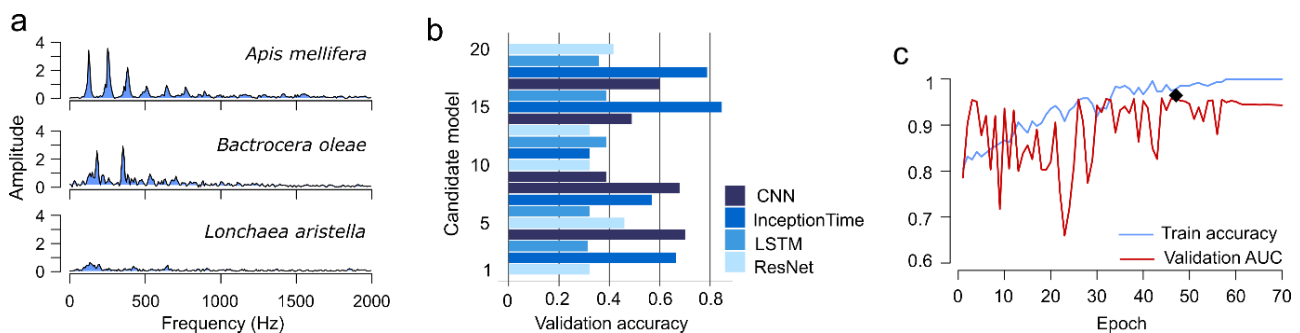

**Figure 2.** Data and results of deep learning models classifying insect species from wingbeat spectrograms. (a) Example wingbeat spectrograms for each species. (b) Validation accuracy for candidate deep learning models. (c) Training and validation curves of the selected model along time (highest validation performance is marked with a diamond symbol).



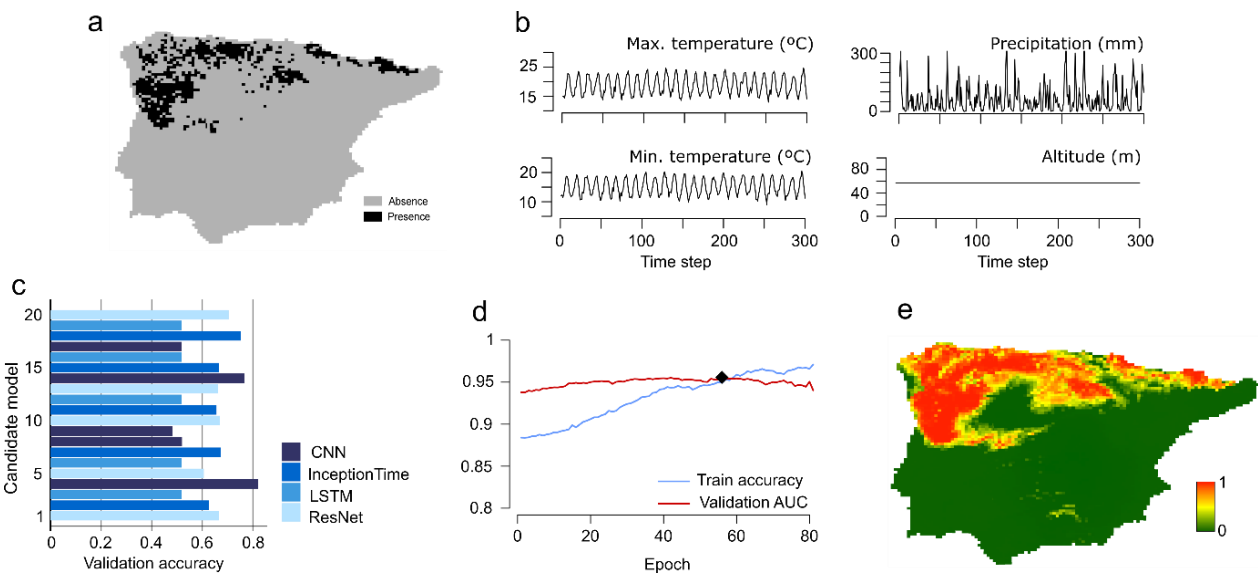

**Figure 3.** Data and results of deep learning models classifying environmental suitability for the Iberian desman. (a) Presence and absence data of the species. (b) Example of time series used as predictors. (c) Validation accuracy for candidate deep learning models. (d) Training and validation curves of the selected model along time. The diamond symbol marks the highest validation performance. (e) Environmental suitability predicted by the selected model.

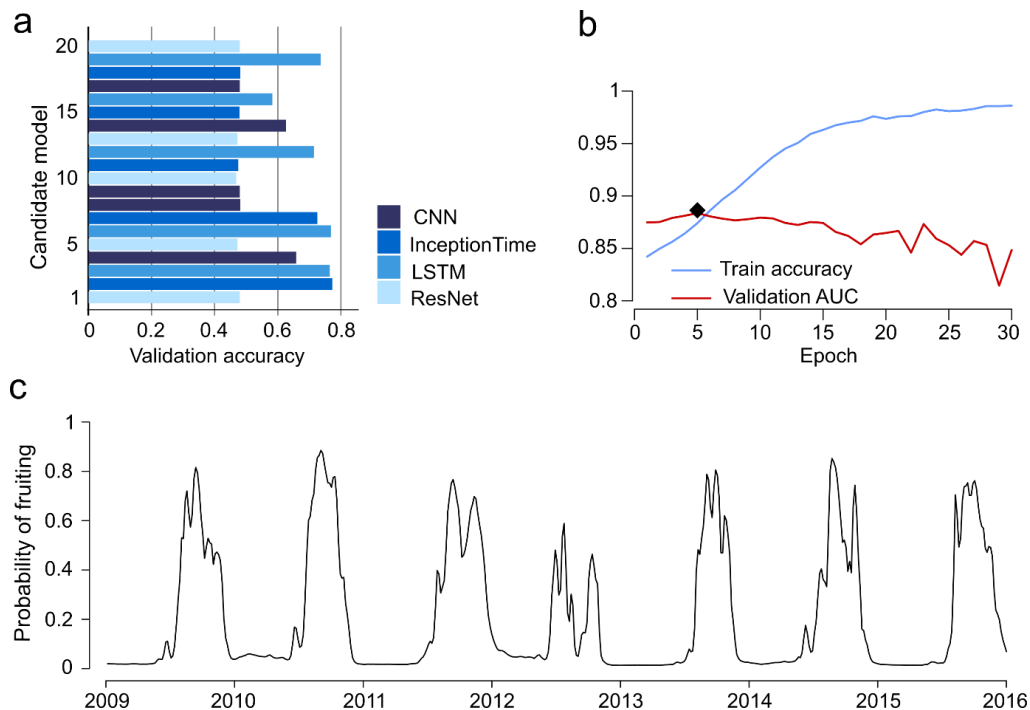

**Figure 4.** Data and results of deep learning models classifying the fruiting phenology of the parasol mushroom based on meteorological variation. (a) Validation accuracy for candidate deep learning models. (b) Training and validation curves of the selected model along time (the diamond symbol marks the highest validation performance). (c) Patterns of fruiting seasonality predicted by the selected model for an example location.

## Discussion

Deep artificial neural networks are a flexible modelling technique with notable success in a range of scientific fields (LeCun *et al.* 2015). In ecology, the adoption of these models is still in its infancy and has been mainly directed towards image recognition (Brodrick *et al.* 2019; Christin *et al.* 2019). We here introduce the use of deep learning models for the classification of temporal data and demonstrate how these models can be implemented and evaluated for distinct tasks across subfields of ecology.

Our case studies demonstrate the versatility and potential of deep learning for time series classification. In the first case study, an InceptionTime model performed well in distinguishing insect species based on spectrograms of their wingbeats. Given the use of different data partition strategies and performance metrics, the performance measured for this model is not fully comparable to those obtained by Potamitis *et al.* (2015) – who classified the same data using distance and feature based approaches. However, our study more accurately identified the honeybee, suggesting its superior classification ability. In the case of *Galemys pyrenaicus*, the predictions from a CNN model also achieved a very high performance, and the predicted spatial patterns are congruent with the known distribution of the species and with existing predictions from feature-based approaches (Barbosa *et al.* 2011). Finally, an InceptionTime model projected ecologically plausible patterns of fruiting seasonality for *Macrolepiota procera*, with performance equalling that obtained by Capinha (2019) (i.e., an AUC of 0.91 on predictions of fruiting in 2015). Unlike the raw time series used by deep learning models, Capinha (2019) used a large set ( $n=40$ ) of hand-crafted features reliant on domain-expertise (e.g. growing degree days).

Despite the valuable results described above, the advantages of deep learning models for time series classification in ecology can only be fully appreciated with wider testing. The

benchmarking of classification performances against traditional modelling approaches and the identification of factors associated with performance differences (e.g. degree of *a priori* ecological knowledge; complexity of the phenomena; volume of training data, etc.) will be of paramount importance. Research efforts should also attempt to identify the deep learning architectures and hyperparameters that are best suited for specific ecological phenomena and data types. Thus far, classification performances from distinct deep learning typologies were compared using time series data coming from multiple domains (e.g. Fawaz *et al.* 2019), and the relevance of these results to ecology remains uncertain.

A distinctive feature of deep learning approaches is that they allow classifying phenomena directly from raw time series data. For ecologists, this ability should be seen not merely as a methodological particularity, but as a conceptual and operational advancement from traditional modelling approaches. On one hand, the use of time series data as predictors positively forces ecologists to consider the temporal component of the analysed phenomena (Wolkovich *et al.* 2014; Ryo *et al.* 2019) and, on the other, it relieves them from subjective decisions about the transformation of the temporal data. This reorientation in thinking was, perhaps, best illustrated by using temporally continuous data – instead of the usual time-averaged variables – for predicting the potential distribution of a species. This ‘fully’ temporally explicit approach can be exploited for virtually any ecological or biological entity or state, as long as the putative drivers have a temporal representation. Further, the usage of time series data by deep learning models matches the increasing number of high frequency streams of digital data coming from distinct sources (e.g. satellite sensors, meteorological stations). The direct integration of these data into the models eliminates the need for resource consuming feature extraction procedures and is thus well-suited for operational modelling frameworks.

As for any modelling approach, deep learning models have limitations. Two are especially prominent: the interpretability of models and computational demand. Limitations to the interpretation of deep learning models have been well described in the literature (e.g. Reichstein *et al.* 2019), however, they are caused mainly by a lack of available tools. Very recently important efforts towards the interpretability of deep learning models have been made (e.g. Siddiqui *et al.* 2019) and given the fast pace of deep learning research, we expect that soon deep learning models will be no harder to interpret than many traditional machine learning models. The challenges arising from computational demand are harder to solve. Here we showed that ‘typical’ classification tasks can take several hours to run on a standard desktop computer. Additionally, the computational expensiveness of deep learning is expected to grow in the future (Thompson *et al.* 2020). To face this challenge, ecologists will likely have to move in the same direction as their fellow computer scientists and embrace faster hardware (e.g. GPUs, ‘tensor processing units’ and large-resourced cloud computing services) and scalable model implementations (e.g. distributed computing).

In conclusion, we consider that the use of deep learning for classifying temporal data in ecology could bring considerable improvements over conventional approaches. Software tools now exist that allow overcoming the implementation barrier for non-experts and state-of-the-art classification results seem a reasonable expectation for several tasks. However, only with extensive testing can the value of this approach be fully recognized. Those willing to venture through this modelling route could use the data and code we provide as a starting point.

### Acknowledgments

CC and ACH were supported by Portuguese National Funds through Fundação para a Ciência e a Tecnologia (CC: CEECIND/02037/2017, UIDB/00295/2020 and UIDP/00295/2020; ACH: PTDC/SAU-PUB/30089/2017 and GHTM-UID/Multi/04413/2013).

**Statement of authorship:** CC conceived the ideas and designed methodology; CC and ACH collected and analysed the data; CC led the writing of the manuscript. All authors contributed critically to the drafts and gave final approval for publication.

**Data accessibility:** Data and code for this study are available from: <https://doi.org/10.5281/zenodo.4017750>

### References

- Bagnall, A., Lines, J., Bostrom, A., Large, J. & Keogh, E. (2017). The great time series classification bake off: a review and experimental evaluation of recent algorithmic advances. *Data Min. Knowl. Disc.*, 31, 606–660.
- Barbosa, A.M., Real, R. & Vargas, Mario J. (2009). Transferability of environmental favourability models in geographic space: The case of the Iberian desman (*Galemys pyrenaicus*) in Portugal and Spain. *Ecol. Model.*, 220, 747–754.
- Bencatel, J., Álvares, F., Moura, A.E. & Barbosa, A.M. (2017). *Atlas de Mamíferos de Portugal*. Universidade de Évora. Évora, pp. 256.
- Bengio, Y., Simard, P. & Frasconi, P. (1994). Learning long-term dependencies with gradient descent is difficult. *IEEE T. Neural. Networ.*, 5, 157–166.
- Booth, T.H., Nix, H.A., Busby, J.R. & Hutchinson, M.F. (2014). bioclim: the first species distribution modelling package, its early applications and relevance to most current MaxEnt studies. *Divers. Distrib.*, 20, 1–9.
- Brodrick, P.G., Davies, A.B. & Asner, G.P. (2019). Uncovering Ecological Patterns with Convolutional Neural Networks. *Trends Ecol. Evol.*, 34, 734–745.
- Capinha, C. (2019). Predicting the timing of ecological phenomena using dates of species occurrence records: a methodological approach and test case with mushrooms. *Int. J. Biometeorol.*, 63, 1015–1024.

- Christin, S., Hervet, É. & Lecomte, N. (2019). Applications for deep learning in ecology. *Methods Ecol. Evol.*, 10, 1632–1644.
- Chung, J., Gulcehre, C., Cho, K. & Bengio, Y. (2014). Empirical Evaluation of Gated Recurrent Neural Networks on Sequence Modeling. *arXiv:1412.3555 [cs]*.
- Currie, D.J. (2019). Where Newton might have taken ecology. *Global Ecol. Biogeog.*, 28, 18–27.
- Dyderski, M.K., Paż, S., Frelich, L.E. & Jagodziński, A.M. (2018). How much does climate change threaten European forest tree species distributions? *Glob. Change Biol.*, 24, 1150–1163.
- Fawaz, H.I., Forestier, G., Weber, J., Idoumghar, L. & Muller, P.-A. (2019). Deep learning for time series classification: a review. *Data Min. Knowl. Disc.*, 33, 917–963.
- Fick, S.E. & Hijmans, R.J. (2017). WorldClim 2: new 1-km spatial resolution climate surfaces for global land areas. *Int. J. Climatol.*, 37, 4302–4315.
- He, K., Zhang, X., Ren, S. & Sun, J. (2016). Deep Residual Learning for Image Recognition. In: *2016 IEEE Conference on Computer Vision and Pattern Recognition (CVPR)*. Presented at the 2016 IEEE Conference on Computer Vision and Pattern Recognition (CVPR), pp. 770–778.
- Hurlbert, A.H. & Liang, Z. (2012). Spatiotemporal Variation in Avian Migration Phenology: Citizen Science Reveals Effects of Climate Change. *PLOS One*, 7, e31662.
- Jaakkola, T., Diekhans, M. & Haussler, D. (2000). A discriminative framework for detecting remote protein homologies. *J. Comput. Biol.*, 7, 95–114.
- Karger, D.N., Conrad, O., Böhner, J., Kawohl, T., Kreft, H., Soria-Auza, R.W., *et al.* (2017). Climatologies at high resolution for the earth's land surface areas. *Sci. Data*, 4, 170122.
- Keogh, E. & Kasetty, S. (2003). On the Need for Time Series Data Mining Benchmarks: A Survey and Empirical Demonstration. *Data Min. Knowl. Disc.*, 7, 349–371.
- LeCun, Y., Bengio, Y. & Hinton, G. (2015). Deep learning. *Nature*, 521, 436–444.
- Lunardon, N., Menardi, G. & Torelli, N. (2014). ROSE: A Package for Binary Imbalanced Learning. *The R J.*, 6, 79–89.
- Melaas, E.K., Friedl, M.A. & Zhu, Z. (2013). Detecting interannual variation in deciduous broadleaf forest phenology using Landsat TM/ETM+ data. *Remote Sens. Environ.*, 132, 176–185.
- Menardi, G. & Torelli, N. (2014). Training and assessing classification rules with imbalanced data. *Data Min. Knowl. Disc.*, 28, 92–122.
- Palomo, L.J., Gisbert, J. & Blanco, J.C. (2007). *Atlas y Libro Rojo de los Mamíferos Terrestres de España*. Organismo Autónomo de Parques Nacionales, Madrid, pp. 582.
- Peters, D.P.C., Havstad, K.M., Cushing, J., Tweedie, C., Fuentes, O. & Villanueva-Rosales, N. (2014). Harnessing the power of big data: infusing the scientific method with machine learning to transform ecology. *Ecosphere*, 5, art67.
- Potamitis, I., Rigakis, I. & Fysarakis, K. (2015). Insect Biometrics: Optoacoustic Signal Processing and Its Applications to Remote Monitoring of McPhail Type Traps. *PLOS One*, 10, e0140474.
- Priyadarshani, N., Marsland, S., Juodakis, J., Castro, I. & Listanti, V. (2020). Wavelet filters for automated recognition of birdsong in long-time field recordings. *Methods Ecol. Evol.*, 11, 403–417.
- R Core Team (2019). A language and environment for statistical computing. Vienna, Austria: R Foundation for Statistical Computing; 2012. URL <https://www.R-project.org>.
- Reichstein, M., Camps-Valls, G., Stevens, B., Jung, M., Denzler, J., Carvalhais, N., *et al.* (2019). Deep learning and process understanding for data-driven Earth system science. *Nature*, 566, 195–204.
- Reside, A.E., VanDerWal, J.J., Kutt, A.S. & Perkins, G.C. (2010). Weather, Not Climate, Defines Distributions of Vagile Bird Species. *PLOS One*, 5, e13569.
- Ryo, M., Aguilar-Trigueros, C.A., Pinek, L., Muller, L.A. & Rillig, M.C. (2019). Basic principles of temporal dynamics. *Trends Ecol. Evol.*, 34, 723–733.

- Schneider, A., Friedl, M.A. & Potere, D. (2010). Mapping global urban areas using MODIS 500-m data: New methods and datasets based on ‘urban ecoregions.’ *Remote Sens. Environ.*, 114, 1733–1746.
- Shamoun-Baranes, J., Bouten, W., van Loon, E.E., Meijer, C. & Camphuysen, C.J. (2016). Flap or soar? How a flight generalist responds to its aerial environment. *Philos. Trans. R. Soc. Lond., B, Biol. Sci.*, 371, 20150395.
- Siddiqui, S.A., Mercier, D., Munir, M., Dengel, A. & Ahmed, S. (2019). Tsviz: Demystification of deep learning models for time-series analysis. *IEEE Access*, 7, 67027–67040.
- Thompson, N.C., Greenewald, K., Lee, K. & Manso, G.F. (2020). The Computational Limits of Deep Learning. *arXiv:2007.05558*.
- van Kuppevelt, D., Meijer, C., Huber, F., van der Ploeg, A., Georgievska, S. & van Hees, V.T. (2020). Mcfly: Automated deep learning on time series. *SoftwareX*, 12, 100548.
- Wang, Z., Yan, W. & Oates, T. (2017). Time series classification from scratch with deep neural networks: A strong baseline. In: *2017 International Joint Conference on Neural Networks (IJCNN)*. Presented at the 2017 International Joint Conference on Neural Networks (IJCNN), pp. 1578–1585.
- Wolkovich, E.M., Cook, B.I., McLauchlan, K.K. & Davies, T.J. (2014). Temporal ecology in the Anthropocene. *Ecol. Lett.*, 17, 1365–1379.
- Zhao, B., Lu, H., Chen, S., Liu, J. & Wu, D. (2017). Convolutional neural networks for time series classification. *J. Syst. Eng. Electron.*, 28, 162–169.
